# Supplementary material for: NIR-II responsive PEGylated MoO2 nanocrystals with LSPR for efficient photothermal and photodynamic performance enhancement
Source: Royal Society of Chemistry journal article supplement (doi:10.1039/d3dt01868g), 2023-01-01
Supplement: d3dt01868g1.pdf [file d3dt01868g1.pdf]

## Supporting Information

### **NIR-II responsive PEGylated MoO<sub>2</sub> nanocrystals with LSPR for efficient photothermal and photodynamic performance enhancement**

*Xuejiao Li,<sup>1,\*</sup> Bo Li,<sup>1</sup> Wenbo Zhang, Zimo Chen, Jinping Liu, Yu Shi, Huanyan Xu, Lianwei  
Shan, Xin Liu, Limin Dong*

**Heilongjiang Provincial Key Laboratory of CO<sub>2</sub> Resource Utilization and Energy Catalytic  
Materials, School of Materials Science and Chemical Engineering, Harbin University of  
Science and Technology, Harbin, 150040, PR China**

\* Correspondence: [lixuejiao@hrbust.edu.cn](mailto:lixuejiao@hrbust.edu.cn)

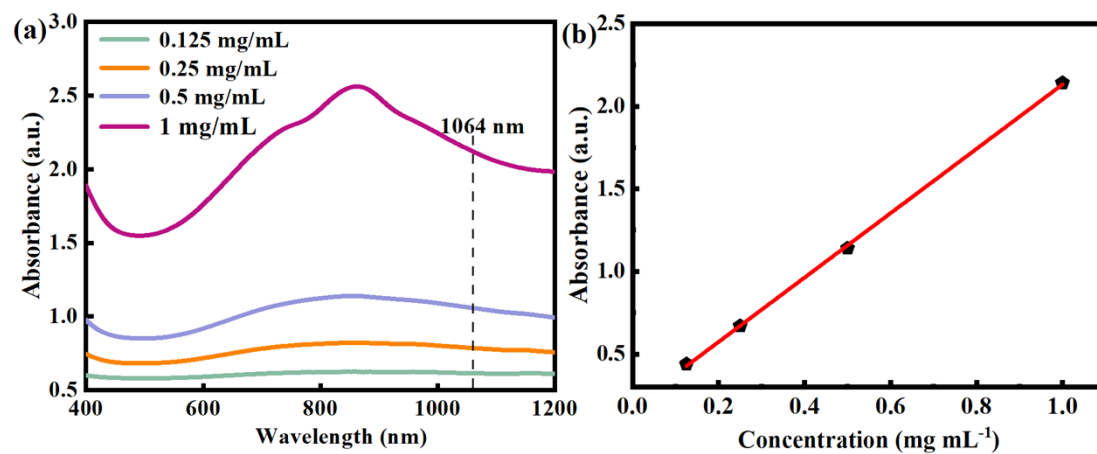

**Fig. S1** (a) The UV-vis-NIR absorption spectra and (b) absorbance intensity of the PEG-MoO<sub>2</sub> NPs at the different concentrations.

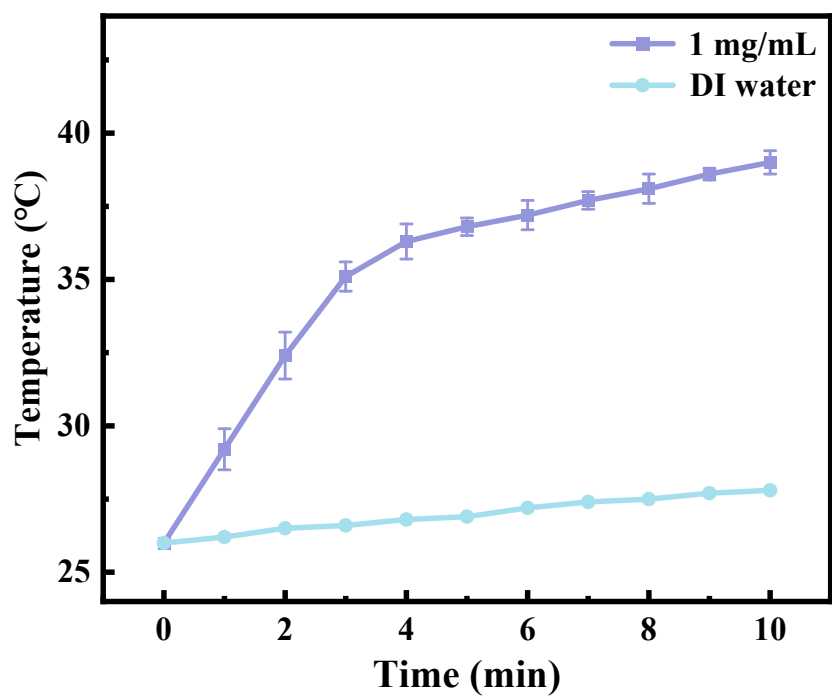

**Fig. S2** Temperature change curves of PEG-MoO<sub>2</sub> under 808 nm, 0.33 W·cm<sup>-2</sup> laser irradiation.
